# Supplementary material for: Downregulation of SOX2 by inhibition of Usp9X induces apoptosis in melanoma
Source: PubMed Central journal article supplement (PMC7869572; doi:10.18632/oncotarget.27869), 2021-02-02
Supplement: oncotarget-12-160-s001.pdf [file oncotarget-12-160-s001.pdf]

## Downregulation of SOX2 by inhibition of Usp9X induces apoptosis in melanoma

### SUPPLEMENTARY MATERIALS

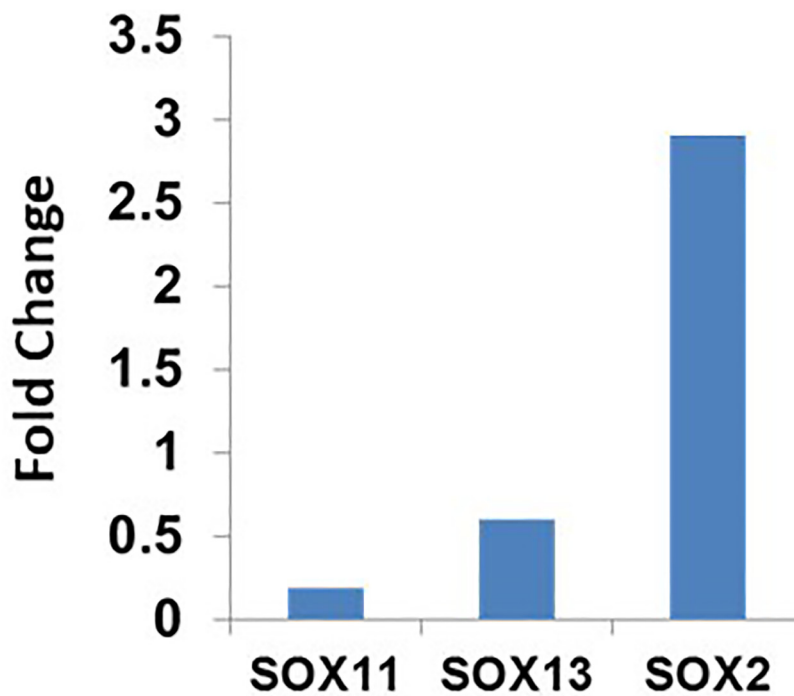

**Supplementary Figure 1: SOX2 induced by BRAF inhibitor in melanoma.** Melanoma cell lines with mutant-BRAF, A375 cells were treated with vemurafenib for the designated time. Expression of SOX2 mRNA showed induction as early as 6 h [24].

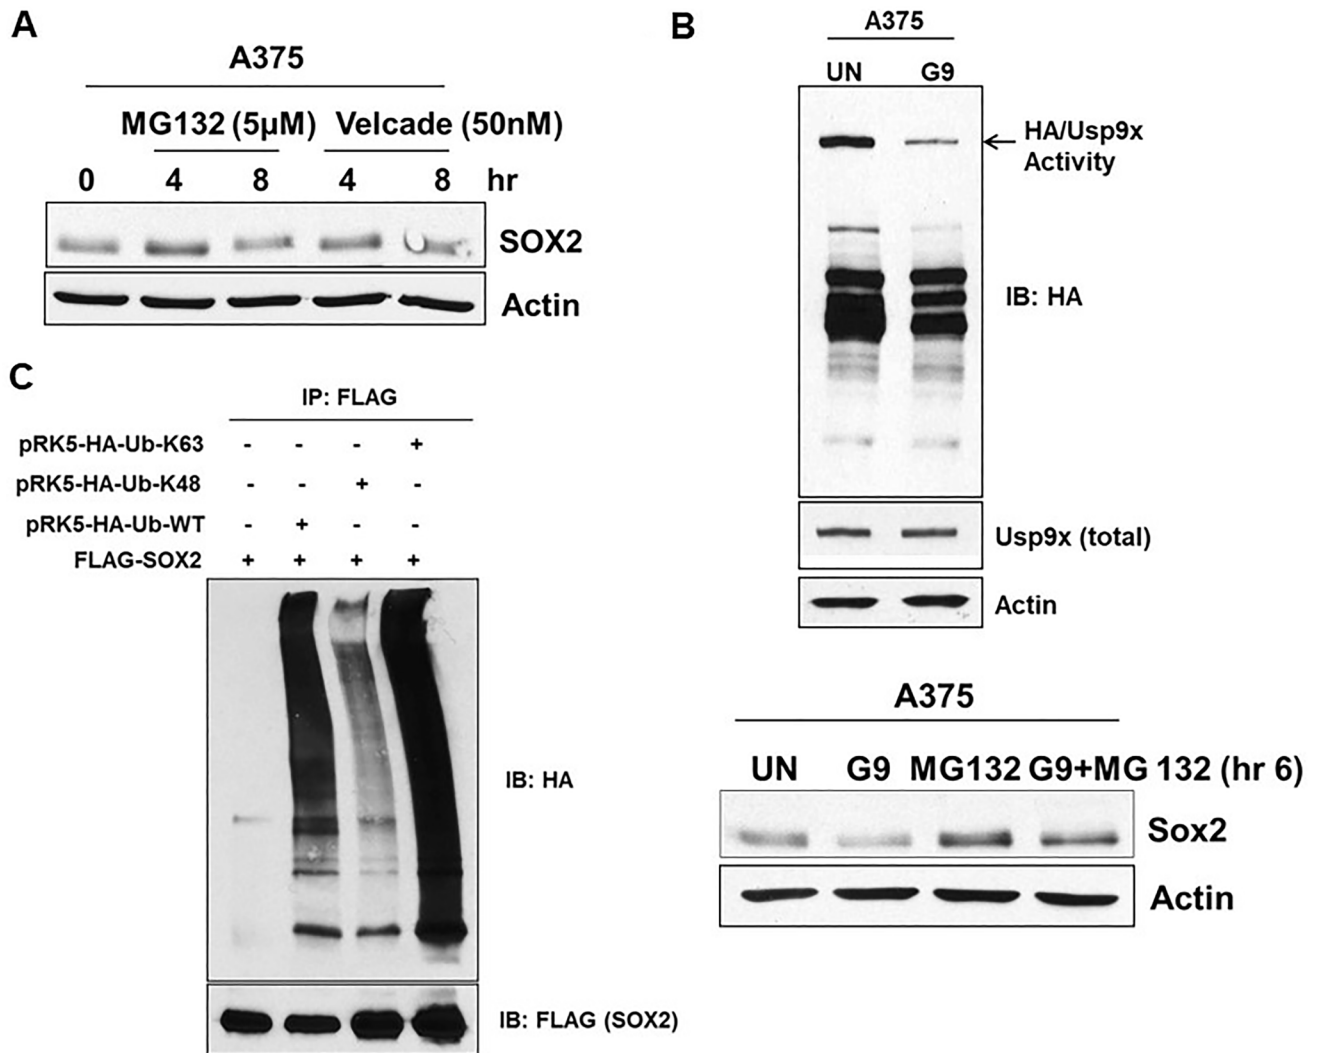

**Supplementary Figure 2: SOX2 is susceptible to proteasomal degradation.** (A) Immunoblot for SOX2 in A375 BRAF-mutant cells treated  $\pm$  MG132 (5  $\mu$ M) and velcade (bortezomib) (50 nM) for 4 and 8 h. (B) Immunoblot for DUB activity after treatment with Usp9x inhibitor G9 (top). Immunoblot for SOX2 in A375 BRAF-mutant cells treated  $\pm$  MG132 for 6 h (10  $\mu$ M) with and without Usp9x inhibitor G9 (2  $\mu$ M) (bottom). (C) K63-linked ubiquitination of SOX2. HEK293T cells were co-transfected with FLAG-SOX2 and pRK5-HA-ubiquitin (WT), pRK5-HA-Ub/K48 only and pRK5-HA-Ub/K63 only expression constructs. After 48 h, FLAG-SOX2 was immunoprecipitated and immunoblotted with antibodies against HA and ubiquitin to detect ubiquitinated SOX2. Actin served as a loading control wherever necessary.

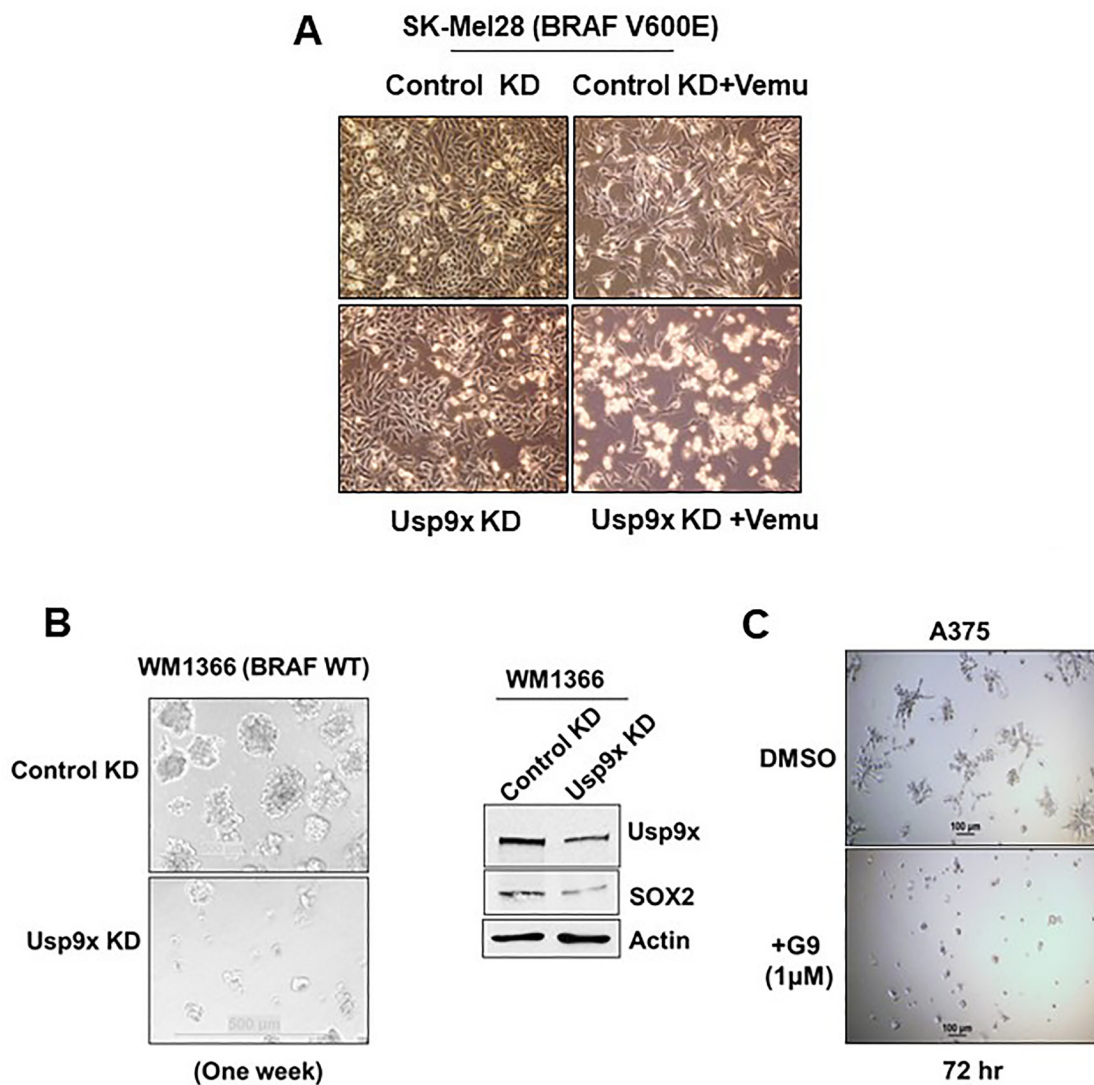

**Supplementary Figure 3: Usp9x regulates SOX2 levels and is required for 3D growth.** (A) Phase-contrast images of BRAF-mutant SK-Mel28 cells treated with vemurafenib with or without Usp9x KD for 48 h. (B) Phase-contrast images of NRAS-mutant WM1366 cells with or without Usp9x KD and grown in 3D (matrigel) for 7 days (left). Protein lysates were extracted from matrigel and Usp9x KD, SOX2 level were confirmed by immunoblot (right). (C) Phase-contrast images of BRAF-mutant (A375) melanoma cells treated with G9 on matrigel for 3 days. Actin served as a loading control wherever necessary.



| <b>Melanoma ID</b>       | <b>Spontaneous macrometastasis in a xenograft assay</b>  |                   |
|--------------------------|----------------------------------------------------------|-------------------|
|                          | <b>Mice with macrometastasis/<br/>tumor-bearing mice</b> | <b>Metastasis</b> |
| <b>M481 (BRAF V600E)</b> | <b>60%</b>                                               | <b>Frequent</b>   |
| <b>M405 (NRAS Q61R)</b>  | <b>70%</b>                                               | <b>Frequent</b>   |
| <b>M610 (BRAF V600E)</b> | <b>0%</b>                                                | <b>Never</b>      |
| <b>M498 (NRAS WT)</b>    | <b>0%</b>                                                | <b>Never</b>      |

**Supplementary Figure 5: Primary human melanoma percent rate of metastasis.** The rate of metastasis represented by the percentage of mice with subcutaneous tumors that developed macrometastases [34].

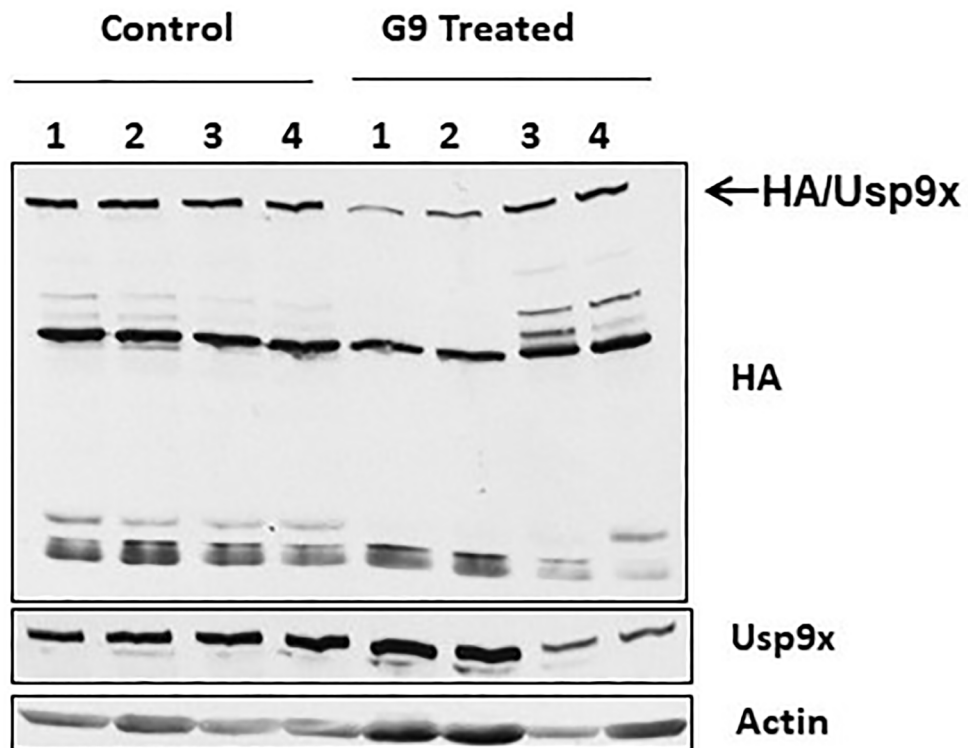

**Supplementary Figure 6: G9 inhibits Usp9x activity *in vivo*.** Tumors were obtained from A375 tumor-bearing mice 1 h after injection with vehicle or G9, and cell lysates were assessed for DUB activity; Usp9x DUB activity is denoted (arrows).
